# Supplementary material for: Evaluation of the polyphenol content, antioxidant activity, and tyrosinase inhibitory activity of ethanol/water extracts of rhizomes of Vietnamese Zingiber officinale, Curcuma longa, Alpinia officinarum, and Boesenbergia pandurata
Source: Royal Society of Chemistry journal article supplement (doi:10.1039/d4nj03473b), 2024-01-01
Supplement: d4nj03473b1.pdf [file d4nj03473b1.pdf]

## Evaluation of polyphenol content, antioxidant activity, tyrosinase inhibitory of ethanol/water extracts from rhizomes of Vietnamese *Zingiber officinale*, *Curcuma longa*, *Alpinia officinarum*, and *Boesenbergia pandurata*

Lu Thi Mong Thy<sup>a</sup>, Dang Thuy Phuong<sup>a</sup>, Nguyen Thi Thuy Tien<sup>a</sup>, Tran Thi Thu Cuc<sup>a</sup>, Nguyen Thi Ai Nhung<sup>a</sup> and Hanh Ngoc Thi Le<sup>\*a</sup>

### Supplementary Information

#### 3.3. Total polyphenol content (TPC)

In this study, the polyphenol content (TPC) of ethanolic extracts was determined using the Folin-Ciocalteu method which was described by Sankhalkar S et al. (2016)<sup>1</sup> and Tan X et al. (2020)<sup>2</sup>. The wavelength used to measure the absorbance of samples was 650nm which agreed with the reports of Sankhalkar S et al. (2016)<sup>1</sup> and Tan X et al. (2020)<sup>2</sup>. Before applying the modified essay to determine the TPC of all extracts, it was evaluated LOD (Limit of Detection), LOQ (Limit of Quantification), linear range, calibration curve, and repeatability according to the ICH guideline Q2 and a report by Thompson M et al. (2002)<sup>3</sup>.

Eight blank samples were used for the determination of the LOD and LOQ. The results showed that LOD and LOQ were 0.099  $\mu\text{g/mL}$  and 0.246  $\mu\text{g/mL}$ , respectively. The linear range was examined with gallic acid concentration in a range of 0.25  $\mu\text{g/mL}$  to 8.75  $\mu\text{g/mL}$ ; the result is shown in Figure 1a. When the concentration of gallic acid was higher than 7.50  $\mu\text{g/mL}$ , its absorbance and concentration had not good linearity with a correlation coefficient of  $R^2 < 0.99$ . Therefore, the linear range was made out in the range of 0.25  $\mu\text{g/mL}$  to 7.50  $\mu\text{g/mL}$  gallic acid. The calibration curve then, was determined and displayed in Figure 1b. The calibration curve equation was determined, Absorbance =  $(0.0881 \times \text{Concentration}) - 0.0123$ . This equation had a correlation coefficient of  $R^2 = 0.9999$ , showing that the absorbance and concentration of gallic acid had good linearity and could be used to evaluate the TPC of all extracts. Acid gallic 1.00  $\mu\text{g/mL}$  was used to evaluate the repeatability and the result showed that RSD (%) was 4.55%, less than 11%. This value satisfied the requirement of method validation.

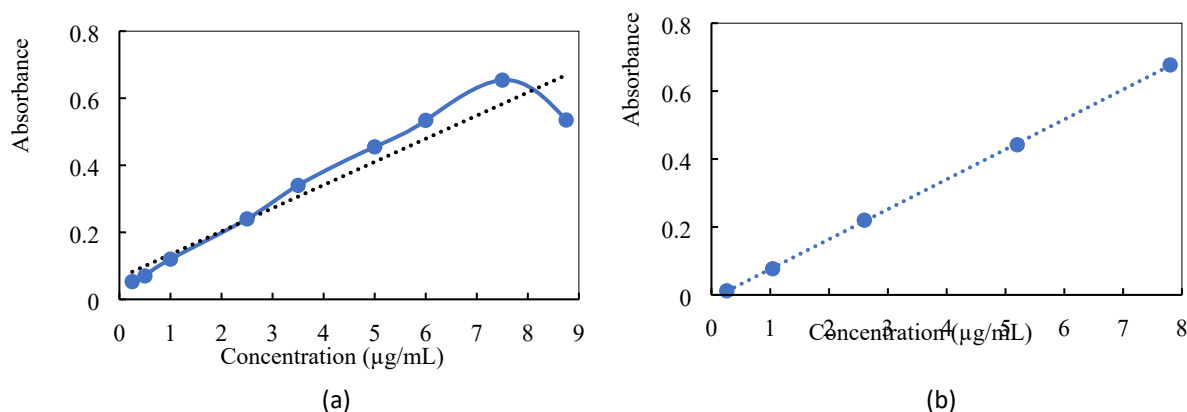

Figure 1. The calibration curve of gallic acid

#### 3.4. Antioxidant ability

In this study, the antioxidant ability of ethanolic extracts was evaluated through their DPPH free radical inhibition ability. The DPPH free radical scavenging ability was evaluated using inhibitory percentage (I%). Table 1 shows the I% values of the obtained extracts and ascorbic acid in different tested concentrations. Each concentration was triplicated.

<sup>a</sup> Faculty of Chemical Engineering, Ho Chi Minh City University of Industry and Trade, 140 Le Trong Tan Street, Tay Thanh Ward, Tan Phu District, Ho Chi Minh City, Vietnam

\*Corresponding author: [hanhltn@huit.edu.vn](mailto:hanhltn@huit.edu.vn), [ngochanh1410@gmail.com](mailto:ngochanh1410@gmail.com)

Table 1. Inhibitory percentage (I%) of extracts in different tested concentrations in antioxidant ability experiments

|                       |                                    |       |        |        |        |
|-----------------------|------------------------------------|-------|--------|--------|--------|
| <i>Z. officinale</i>  | Concentration ( $\mu\text{g/mL}$ ) | 20.2  | 50.5   | 101    | 202    |
|                       | I%                                 | 43.77 | 57.90  | 69.91  | 74.79  |
|                       |                                    | 37.70 | 58.29  | 71.49  | 74.00  |
|                       |                                    | 39.29 | 64.10  | 72.42  | 72.55  |
| <i>C. longa</i>       | Concentration ( $\mu\text{g/mL}$ ) | 10    | 50     | 100    | 200    |
|                       | I%                                 | 4.78  | 58.16  | 84.62  | 87.43  |
|                       |                                    | 5.37  | 60.67  | 85.51  | 88.17  |
|                       |                                    | 5.67  | 57.42  | 86.40  | 89.21  |
| <i>A. officinarum</i> | Concentration ( $\mu\text{g/mL}$ ) | 5150  | 7210   | 9270   | 11330  |
|                       | I%                                 | 20.54 | 88.81  | 90.71  | 90.33  |
|                       |                                    | 22.82 | 89.57  | 90.90  | 90.14  |
|                       |                                    | 22.25 | 89.19  | 91.85  | 90.52  |
| <i>B. pandurata</i>   | Concentration ( $\mu\text{g/mL}$ ) | 50.03 | 100.06 | 200.13 | 250.16 |
|                       | I%                                 | 27.56 | 36.82  | 62.82  | 68.35  |
|                       |                                    | 23.83 | 36.22  | 64.14  | 72.20  |
|                       |                                    | 24.43 | 38.03  | 66.43  | 72.32  |
| Ascorbic acid         | Concentration ( $\mu\text{g/mL}$ ) | 0.11  | 0.27   | 0.50   | 1.35   |
|                       | I%                                 | 3.75  | 11.89  | 23.14  | 74.14  |
|                       |                                    | 3.99  | 12.61  | 20.51  | 72.47  |
|                       |                                    | 5.91  | 13.81  | 21.95  | 73.42  |

### 3.5. Tyrosinase enzyme inhibition ability

In this study, the tyrosinase enzyme inhibition ability of ethanolic extracts was evaluated. The tyrosinase inhibition ability was evaluated using inhibitory percentage (I%). Table 2 shows the I% values of the obtained extracts and kojic acid in different tested concentrations. Each concentration was triplicated.

Table 2. Inhibitory percentage (I%) of extracts in different tested concentrations in tyrosinase inhibition ability experiments

|                       |                                    |          |          |          |       |
|-----------------------|------------------------------------|----------|----------|----------|-------|
| <i>Z. officinale</i>  | Concentration ( $\mu\text{g/mL}$ ) | 50       | 100      | 200      | 300   |
|                       | I%                                 | 30.56    | 52.41    | 91.24    | 95.81 |
|                       |                                    | 33.33    | 52.60    | 90.67    | 95.43 |
|                       |                                    | 35.19    | 58.50    | 90.10    | 92.58 |
| <i>C. longa</i>       | Concentration ( $\mu\text{g/mL}$ ) | 25       | 50       | 100      | -     |
|                       | I%                                 | 46.73    | 90.19    | -        | -     |
|                       |                                    | 49.53    | 88.79    | -        | -     |
|                       |                                    | 48.13    | 92.99    | -        | -     |
| <i>A. officinarum</i> | Concentration ( $\mu\text{g/mL}$ ) | 100      | 200      | 300      | 400   |
|                       | I%                                 | 40.75    | 50.16    | 52.04    | 49.22 |
|                       |                                    | 43.57    | 56.74    | 49.22    | 61.44 |
|                       |                                    | 41.69    | 52.98    | 51.10    | 54.86 |
| <i>B. pandurata</i>   | Concentration ( $\mu\text{g/mL}$ ) | 250      | 300      | 400      | -     |
|                       | I%                                 | 19.62865 | 29.97347 | 67.65217 | -     |

<sup>a</sup> Faculty of Chemical Engineering, Ho Chi Minh City University of Industry and Trade, 140 Le Trong Tan Street, Tay Thanh Ward, Tan Phu District, Ho Chi Minh City, Vietnam

\*Corresponding author: [hanhltn@huit.edu.vn](mailto:hanhltn@huit.edu.vn), [ngochanh1410@gmail.com](mailto:ngochanh1410@gmail.com)

|            |                                    |          |          |          |   |
|------------|------------------------------------|----------|----------|----------|---|
|            |                                    | 14.85411 | 29.17772 | 67.65217 | - |
|            |                                    | -        | 31.56499 | 68.17391 | - |
| Kojic acid | Concentration ( $\mu\text{g/mL}$ ) | 1.36     | 6.80     | 13.60    | - |
|            | I%                                 | 32.39    | 54.93    | 64.79    | - |
|            |                                    | 29.58    | 57.75    | 74.65    | - |
|            |                                    | 33.80    | 52.11    | 67.61    | - |

"-": be not tested or determined

## References

- 1 S. Sankhalkar and V. Vernekar, *Pharmacognosy Res*, 2016, **8**, 16–21.
- 2 X. W. Tan, K. Kobayashi, L. Shen, J. Inagaki, M. Ide, S. S. Hwang and E. Matsuura, *Heliyon*, 2020, **6**, 1–18.
- 3 M. Thompson, S. L. R. Ellison and R. Wood, *Resulting from the Symposium on Harmonization of Quality Assurance Systems for Analytical Laboratories*, 2002, vol. 74.
